# Supplementary material for: Effects of Current on Arc Fabrication of Cu Nanoparticles
Source: Hindawi journal article supplement (doi:10.1155/2010/403197), 2010-01-01
Supplement: f1 [file 403197.f1.pdf]

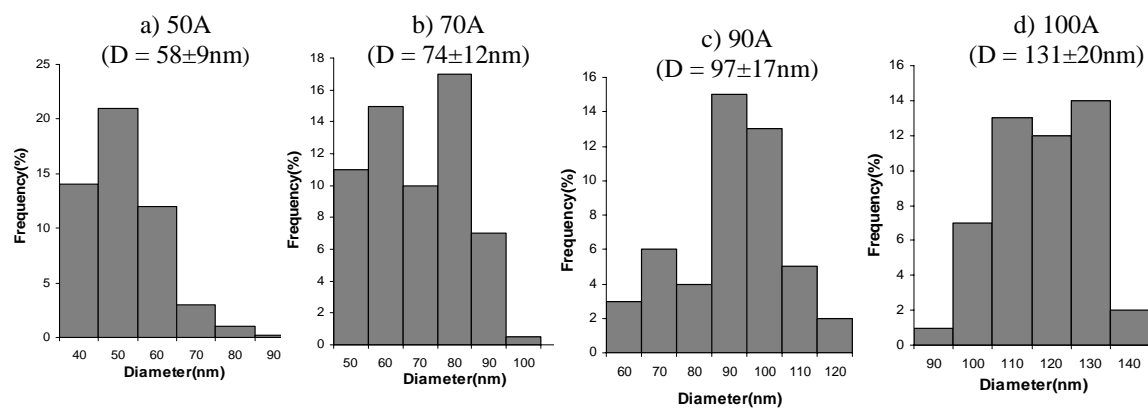

Fig. S1. Effects of four different currents (50-100A) on the size distributions of the arc fabricated

Cu

Nps, in distilled water calculated on the basis of the corresponding SEM images (Fig. 1a-d).

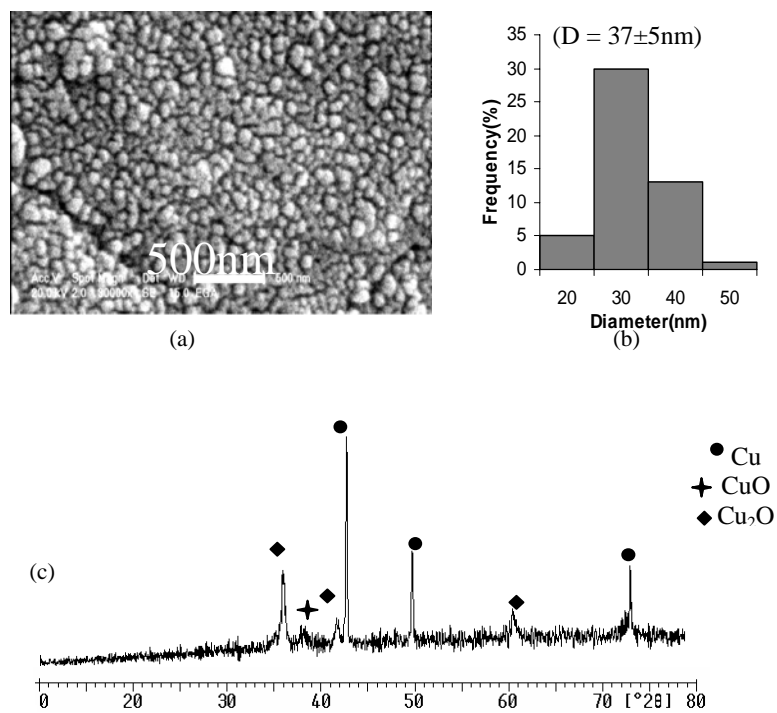

Fig. S2. Characterizations of a sample of the watery black nanopowders, arc fabricated at 50A: The SEM image (a), the size distribution calculated on the basis of the corresponding SEM image (b), and the XRD pattern showing a mixture of Cu, Cu<sub>2</sub>O, and CuO (c).

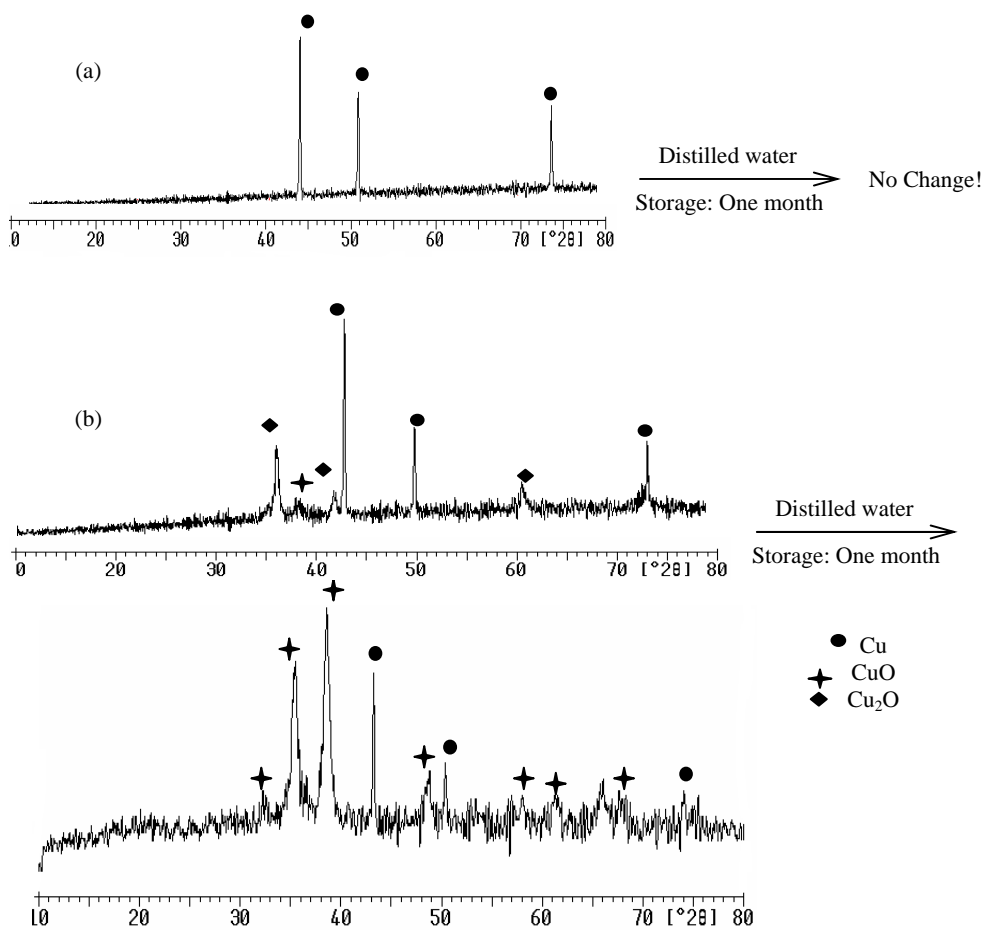

Fig. S3. Comparison between XRD patterns of as-produced nanopowders fabricated at 50A, before and after one month storage in distilled water: the brown nanopowder containing pure Cu Nps (a), the dark mixture initially containing Cu and copper oxides nanoparticles (b).

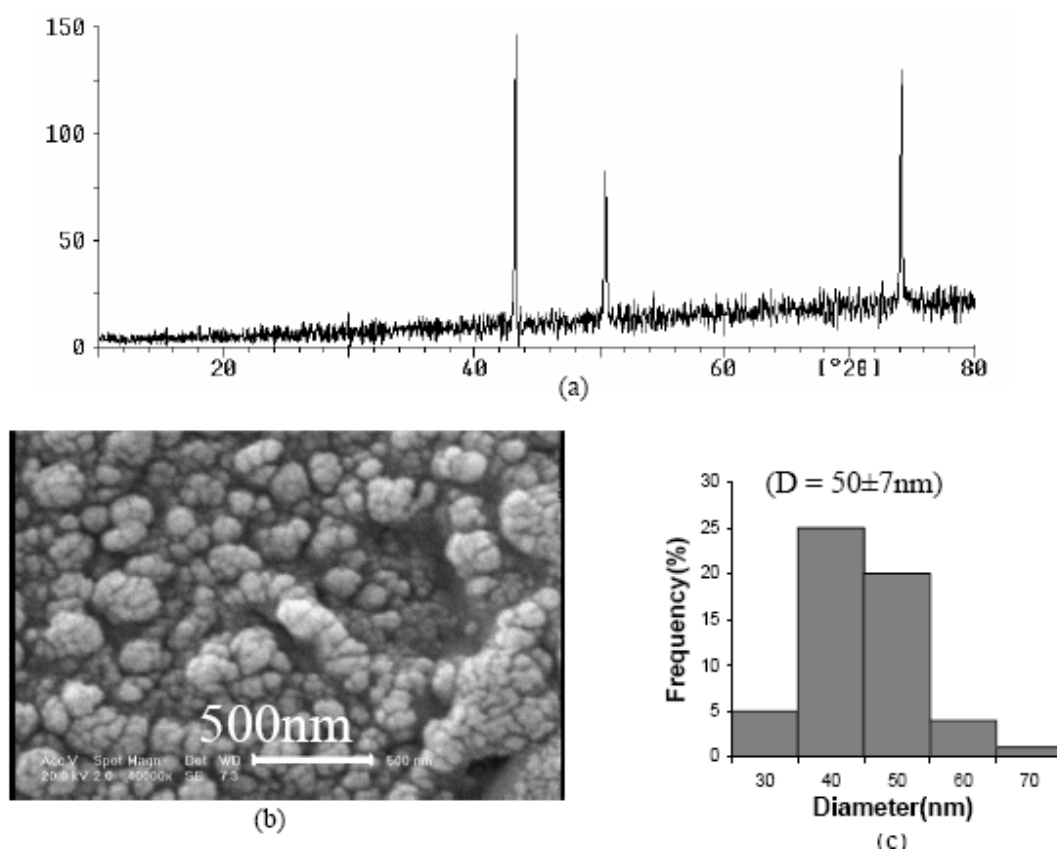

Fig. S4. Characterizations of the arc fabricated brown nanopowder obtained using an aqueous PVP

medium at 50A: The XRD pattern showing pure Cu Nps as the only product (a), the SEM image (b), and the size distribution calculated on the basis of the corresponding SEM image (c).

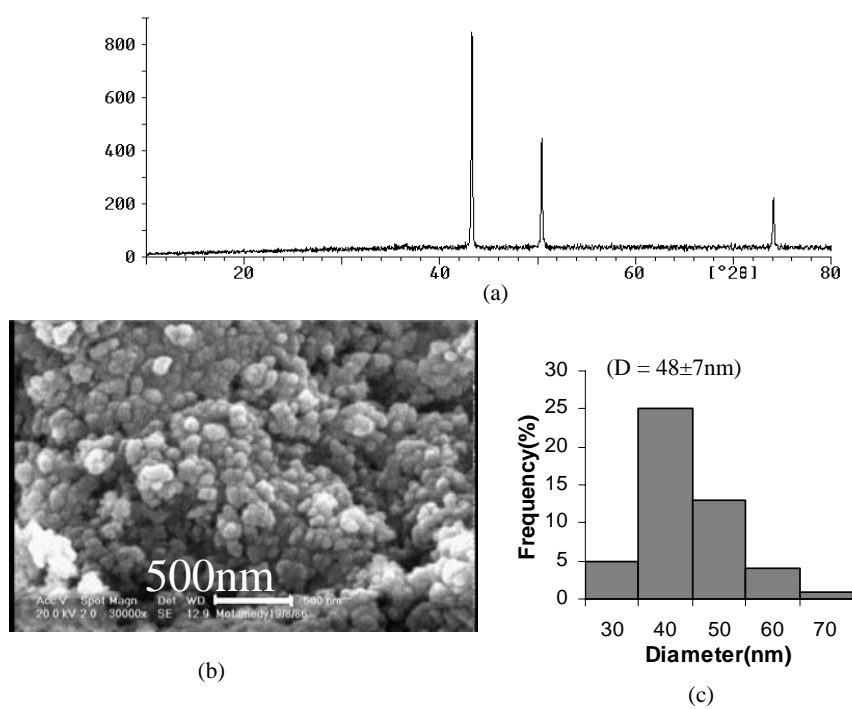

Fig. S5. Characterizations of a brown nanopowder, arc fabricated at 30A in distilled water: The XRD pattern showing pure Cu Nps as the only product (a), the SEM image (b), and the size distribution calculated on the basis of the corresponding SEM image (c).
